# Supplementary material for: Luminescent europium(iii)–β-diketonate complexes hosted in nanozeolite L as turn-on sensors for detecting basic molecules
Source: Royal Society of Chemistry journal article supplement (doi:10.1039/c4cc05635c), 2014-01-01
Supplement: c4cc05635c1.pdf [file c4cc05635c1.pdf]

**Electronic supporting informations**

**A Luminescent Europium (III)- $\beta$ -diketonate complex Hosted in Nanozeolite L as a Turn-On Sensor for Basic Molecules**

Peng Li<sup>a</sup>, Yuzhao Zhang<sup>b</sup>, Yige Wang<sup>a</sup>, Yanji Wang<sup>a</sup> and Huanrong Li<sup>a</sup>

<sup>a</sup> School of Chemical Engineering and Technology

Hebei University of Technology

Guang Rong Dao 8, Hongqiao Distric, Tianjin 300130 (China)

E-Mail: lihuanrong@hebut.edu.cn

<sup>b</sup> School of Control Science and Engineering

Hebei University of Technology

Guang Rong Dao 8, Hongqiao Distric, Tianjin 300130 (China)

## Experimental Section

**Materials:** 2-Thenoyltrifluoroacetone (TTA) was bought from Sigma-Aldrich and used as received. Nanozeolite L(NZ) were synthesized according to the procedure reported previously by using a starting mixture with the composition  $5.40\text{K}_2\text{O}-5.50\text{Na}_2\text{O}-1.00\text{Al}_2\text{O}_3-30.00\text{SiO}_2-416.08\text{H}_2\text{O}$ .<sup>1</sup> Solutions of  $\text{EuCl}_3 \cdot 6\text{H}_2\text{O}$  in ethanol were prepared by dissolving  $\text{Eu}_2\text{O}_3$  in concentrated hydrochloric acid. The host-guest composites  $\text{Eu}^{3+}(\text{TTA}_n)\text{-NZL}$  were prepared according to the procedure<sup>2</sup> and described as follows: 500mg of NZL was added to 15ml of a 0.1M ethanol solution of  $\text{EuCl}_3 \cdot 6\text{H}_2\text{O}$  and stirred for 24h at 353K. The product ( $\text{Eu}^{3+}\text{-NZL}$ ) was collected by centrifugation, washed with de-ionized water and dried in air at 343K. 200mg of  $\text{Eu}^{3+}\text{-NZL}$  was degassed and dried for 2 h at 423 K and then kept in contact with the TTA vapor at 393 K for 24 h. The obtained materials were washed with  $\text{CH}_2\text{Cl}_2$  for three times in order to remove only physically adsorbed TTA, and dried at  $40^\circ\text{C}$  in vacuum for 12 h.

Glass plates were dipped into an acid bath consisting of potassium dichromate and sulfuric acid for 12 h to remove possible organic residues on the surface. The plates were then washed with copious amounts of de-ionized water and dried at  $80^\circ\text{C}$  in clean air for 3 h.

**Exposure to various solvent:** Powder samples of  $\text{Eu}^{3+}(\text{TTA}_n)\text{-NZL}$  were used for sensing experiments, the setup is shown below. For each experiment, 200 mg of  $\text{Eu}^{3+}(\text{TTA}_n)\text{-NZL}$  was put in a small bottle and exposed to various solvent vapors. The powder and the small bottle were placed into a sealed container (about 100 ml), which contains about 5 ml of solvent for 1 h. And then the luminescence spectra of  $\text{Eu}^{3+}(\text{TTA}_n)\text{-NZL}$ , before and after exposed to the solvent vapors, were measured in a sample holder.

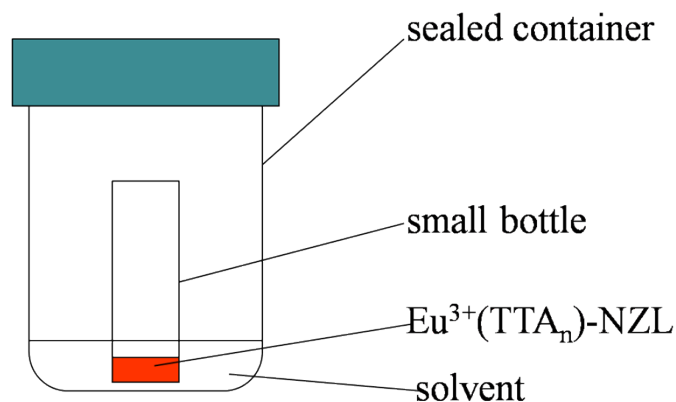

Diagram of the experimental setup for exposing  $\text{Eu}^{3+}(\text{TTA}_n)\text{-NZL}$  to different solvent vapors.

**Preparation of film:** 10 mg of  $\text{Eu}^{3+}(\text{TTA}_n)\text{-NZL}$  was dispersed in 5 mL of de-ionized water. The mixture was sonicated for 2 h to obtain a colloidal suspension which was kept for 5h. The thin film was formed by dropping the colloidal suspension on micro slide glasses, followed by evaporation of water at  $60^\circ\text{C}$  in air.

### **Detection of the stability of $\text{Eu}^{3+}(\text{TTA}_n)\text{-NZL}$**

Powder samples of  $\text{Eu}^{3+}(\text{TTA}_n)\text{-NZL}$  were alternatively exposure to FA– $\text{Et}_3\text{N}$  cycles

**Physical measurements:** Infrared (IR) spectra were obtained with a Bruker Vector 22 spectrometer by using KBr pellets for solid samples from  $400\text{-}4000\text{ cm}^{-1}$  at a resolution of  $4\text{ cm}^{-1}$  (128scans collected). SEM images were obtained from a FE-SEM (Hitachi S-4300) at an acceleration voltage of 10 kV. X-ray diffraction patterns were taken on a on a Rigaku-Dmax 2500 diffractometer using  $\text{Cu K}\alpha 1$  radiation. The steady-state luminescence spectra and the lifetime

measurements were measured on an Edinburgh Instruments FS920P near-infrared spectrometer, with a 450 W xenon lamp as the steady-state excitation source, a double excitation monochromator (1800 lines·mm<sup>-1</sup>), an emission monochromator (600 lines·mm<sup>-1</sup>), a semiconductor cooled Hamamatsu RMP928 photomultiplier tube. A microsecond flash lamp (pulse length: 2 μs) was used as the excitation source for the lifetime measurements. Photons were collected up to 10 ms until maximum of 10<sup>4</sup> counts. Decay curves were fitted according to a bi-exponential function ( $I=I_0+A_1 \exp (-t/\tau_1) + A_2\exp (-t/\tau_2)$ ). The decay times reported are accordingly the average decay times  $\langle\tau\rangle$ .

- 1(a) A. Z. Ruiz, D. Brühwiler, T. Ban and G. Calzaferri, *Monatshefte für Chemie/Chemical Monthly*, 2005, **136**, 77; (b) S. Megelski and G. Calzaferri, *Advanced Functional Materials*, 2001, **11**, 277.
- 2 H. Li, W. Cheng, Y. Wang, B. Liu, W. Zhang and H. Zhang, *Chemistry-A European Journal*, 2010, **16**, 2125.

## Spectra

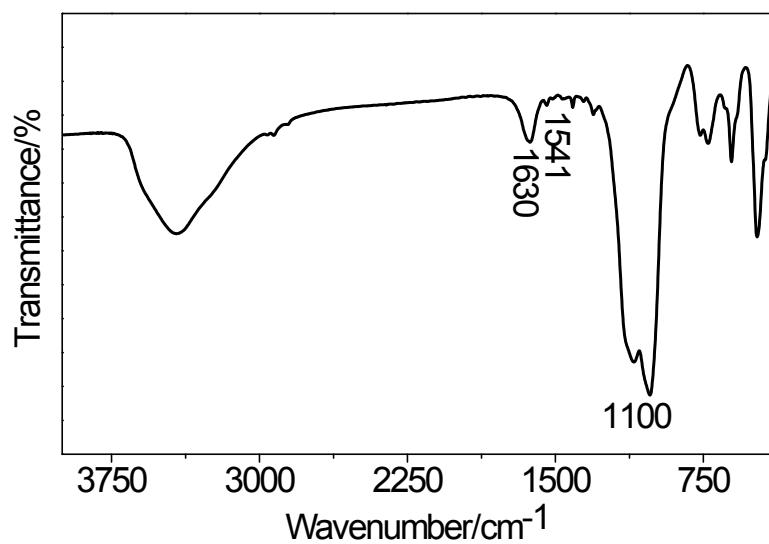

Fig. S1. FT-IR spectrum of  $\text{Eu}^{3+}(\text{TTA}_n)\text{-NZL}$

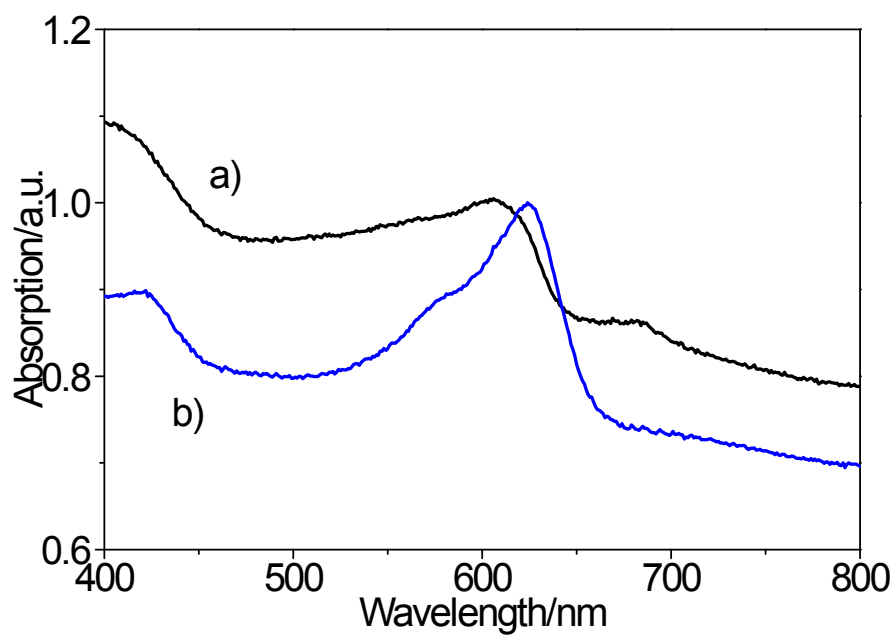

Fig.S2 UV-VIS absorption spectra of thionine in  $\text{Eu}^{3+}(\text{TTA}_n)\text{-NZL}$  (a) and  $\text{Et}_3\text{N}$  vapor-treated  $\text{Eu}^{3+}(\text{TTA}_n)\text{-NZL}$  (b).

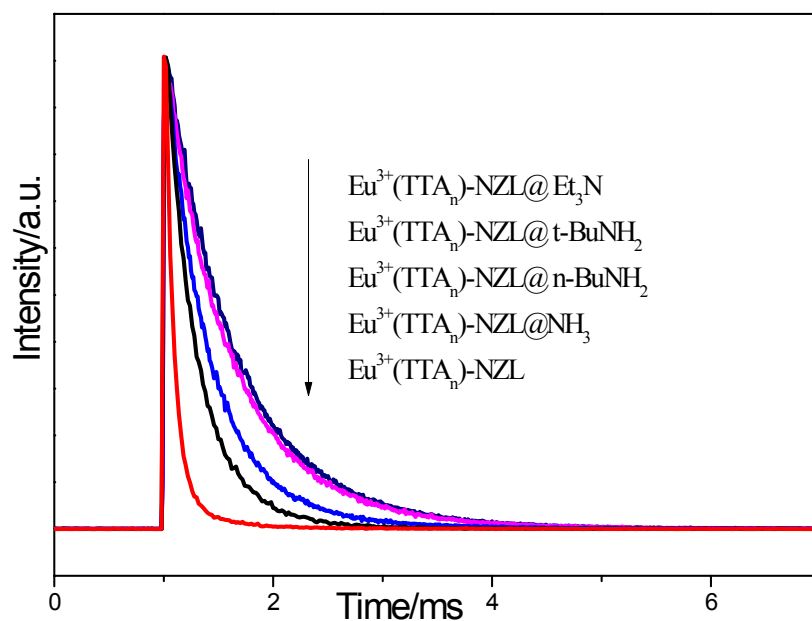

Fig.S3. Decay curves of  $\text{Eu}^{3+}(\text{TTA}_n)\text{-NZL}$  after exposure to various vapors for 1h measured at room temperature using an excitation of 345 nm and monitored around the most intense emission line at 612 nm, which can be well-fitted by a bi-exponential function.

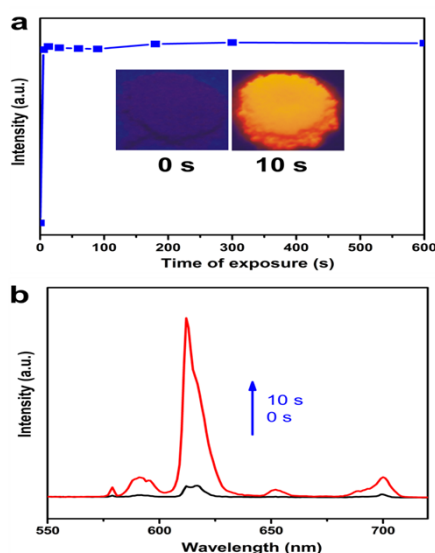

Fig. S4. (a) Time-dependent emission of  $^5\text{D}_0 \rightarrow ^7\text{F}_2$  transition at 612 nm enhancement by  $\text{Et}_3\text{N}$  vapor, Inset: Digital photos of  $\text{Eu}^{3+}(\text{TTA}_n)\text{-NZL}$  before and after exposure of  $\text{Et}_3\text{N}$  taken under UV illumination. (b) Corresponding emission spectra before and after exposure of  $\text{Et}_3\text{N}$ .

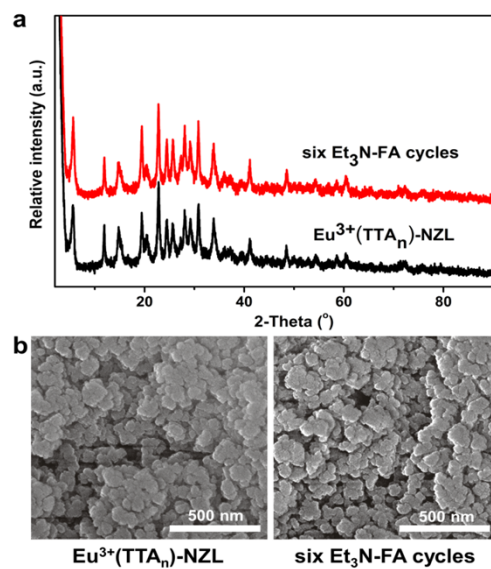

Fig. S5. XRD patterns (a) and (b) SEM images of Eu<sup>3+</sup>(TTA<sub>n</sub>)-NZL before and after six Et<sub>3</sub>N-FA vapor exposure cycles
